# Supplementary material for: Experimental Design and Protocol for Standardized Measurements of Rock Erodibility in Fluvial Impact Erosion
Source: Atypon-hosted journal article supplement (doi:10.1061/jhend8.hyeng-13346), 2023-09-26
Supplement: supplemental materials_jhend8.hyeng-13346_turowski.pdf [file supplemental%20materials_jhend8.hyeng-13346_turowski.pdf]

## SUPPLEMENTAL MATERIALS

*ASCE Journal of Hydraulic Engineering*

# Experimental Design and Protocol for Standardized Measurements of Rock Erodibility in Fluvial Impact Erosion

Jens M. Turowski, Gunnar Pruß, and Markus Reich

**DOI:** 10.1061/JHEND8.HYENG-13346

© ASCE 2023

[www.ascelibrary.org](http://www.ascelibrary.org)



↓

TEILELISTE

| OBJEKT | ANZAHL | BAUTEILNUMMER                                                   | BESCHREIBUNG                  |
|--------|--------|-----------------------------------------------------------------|-------------------------------|
| 1      | 1      | Behälterrohr                                                    |                               |
| 2      | 1      | Bohrkern 1                                                      |                               |
| 3      | 1      | Proben-Dichtung Moosgummischnur                                 |                               |
| 5      | 1      | Grundplatte 1                                                   |                               |
| 6      | 1      | Boden 1                                                         |                               |
| 7      | 2      | Bodendichtung                                                   |                               |
| 8      | 1      | Deckplatte                                                      |                               |
| 9      | 4      | Gewindestange                                                   | M8 x 290                      |
| 10     | 8      | DIN 125 - A 8,4                                                 | Unterlegscheibe               |
| 13     | 4      | ISO 4032 - M8                                                   | Sechskantmutter               |
| 15     | 4      | CSN 021461 - M8                                                 | Rändelmuttern                 |
| 16     | 1      | Doga Motor 24V 1000rpm                                          |                               |
| 19     | 4      | ISO 4762 - M6 x 20                                              | Innensechskantschraube        |
| 20     | 1      | Starre K TR 60099108                                            | Starre K TR-Rigid Coupling TR |
| 21     | 1      | Propellerwelle                                                  |                               |
| 23     | 1      | Propeller Raboesch 146-25                                       |                               |
| 24     | 1      | Propeller Abstroemkonus Raboesch 146-25                         |                               |
| 25     | 1      | Dichtung Radial-Wellendichtring                                 | DIN 3760 A 8,0x16,0x7 FKM     |
| 26     | 1      | Deckel Dichtung                                                 |                               |
| 29     | 4      | Abstandhalter lang M5                                           |                               |
| 33     | 4      | ISO 4762 - M5 x 16                                              | Innensechskantschraube        |
| 34     | 1      | M5230 For Reference Only Confidential                           | STEP AP203                    |
| 35     | 1      | 0134 Syringe Spritze LuerLock Braun<br>Omnifix 20ml mit Fitting |                               |
| 36     | 1      | FTLL220-5                                                       |                               |
| 37     | 1      | Verbinderschlauch 3                                             |                               |

|                                                                                                                                                                                                     |          |      |                        |               |
|-----------------------------------------------------------------------------------------------------------------------------------------------------------------------------------------------------|----------|------|------------------------|---------------|
|  <p>GERMAN RESEARCH CENTRE FOR GEOSCIENCES<br/><b>GFZ</b><br/>Helmholtz Centre<br/>POTSDAM<br/>GEOMORPHOLOGY</p> |          |      | Material Acrylic       |               |
|                                                                                                                                                                                                     |          |      | Scale                  | Mass          |
|                                                                                                                                                                                                     | Datum    | Name | Abrasionsmühle Paper-1 |               |
|                                                                                                                                                                                                     | engineer |      | Project: Erosion Mill  |               |
| revision                                                                                                                                                                                            | A        |      |                        | Bl.2<br>Gr.A4 |

↑

A-A ( 1 : 5 )

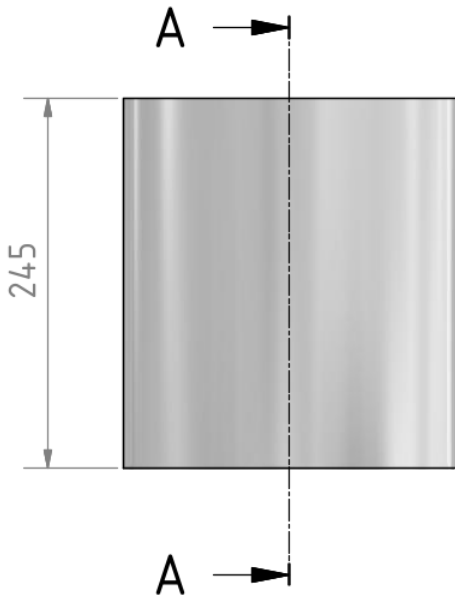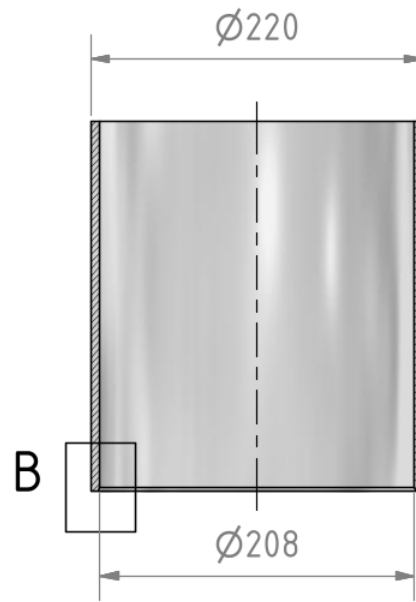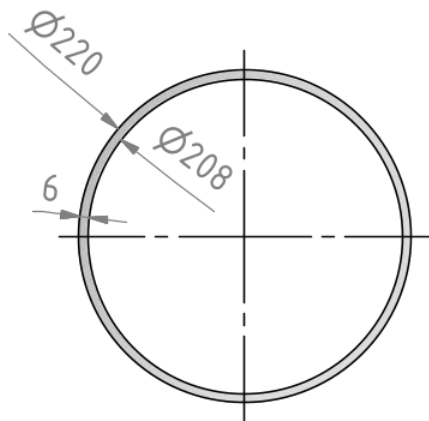

B ( 1 : 1 )

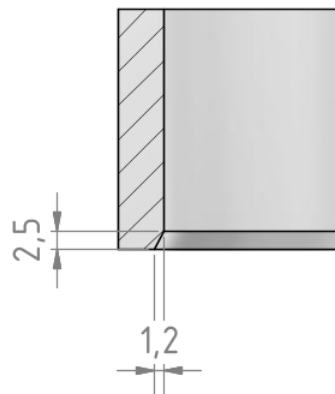

| <p>DEUTSCHES GEOLFORSCHUNGSZENTRUM POTSDAM</p> <p><b>GFZ</b></p> <p>Helmholtz-Zentrum<br/><b>POTSDAM</b></p> <p><b>GEOMORPHOLOGIE</b></p> | ISO 2768-FH                                                                                                                                                                                                                                                                                               | Maßstab 1 : 5                                                 | Gewicht 1,18 kg |      |             |  |              |           |            |              |          |   |  |              |                         |
|-------------------------------------------------------------------------------------------------------------------------------------------|-----------------------------------------------------------------------------------------------------------------------------------------------------------------------------------------------------------------------------------------------------------------------------------------------------------|---------------------------------------------------------------|-----------------|------|-------------|--|--------------|-----------|------------|--------------|----------|---|--|--------------|-------------------------|
|                                                                                                                                           | <p>unbemaßte Werkstück-<br/>kanten ISO 13715</p> <p>-0,1      +0,1<br/>-0,2      +0,3</p>                                                                                                                                                                                                                 | Werkstoff: PMMA (Acrylglas)<br>(CAD-Modell: Acrylglas (PMMA)) | Stückzahl       |      |             |  |              |           |            |              |          |   |  |              |                         |
|                                                                                                                                           | <table border="1"> <thead> <tr> <th></th> <th>Datum</th> <th>Name</th> </tr> </thead> <tbody> <tr> <td>konstruiert</td> <td></td> <td>Markus Reich</td> </tr> <tr> <td>Ingenieur</td> <td>02.11.2018</td> <td>Markus Reich</td> </tr> <tr> <td>Revision</td> <td>B</td> <td></td> </tr> </tbody> </table> |                                                               | Datum           | Name | konstruiert |  | Markus Reich | Ingenieur | 02.11.2018 | Markus Reich | Revision | B |  | Behälterrohr | Datei: Behälterrohr.ipt |
|                                                                                                                                           |                                                                                                                                                                                                                                                                                                           | Datum                                                         | Name            |      |             |  |              |           |            |              |          |   |  |              |                         |
| konstruiert                                                                                                                               |                                                                                                                                                                                                                                                                                                           | Markus Reich                                                  |                 |      |             |  |              |           |            |              |          |   |  |              |                         |
| Ingenieur                                                                                                                                 | 02.11.2018                                                                                                                                                                                                                                                                                                | Markus Reich                                                  |                 |      |             |  |              |           |            |              |          |   |  |              |                         |
| Revision                                                                                                                                  | B                                                                                                                                                                                                                                                                                                         |                                                               |                 |      |             |  |              |           |            |              |          |   |  |              |                         |
|                                                                                                                                           |                                                                                                                                                                                                                                                                                                           | Auftrag: Jens Turowski<br>Projekt: Abrasionsmühle             | Bl.1<br>Gr.A4   |      |             |  |              |           |            |              |          |   |  |              |                         |

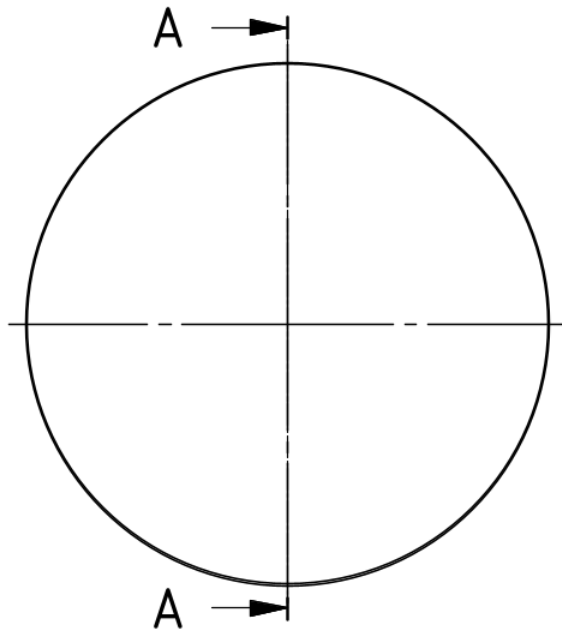

A-A ( 1 : 3 )

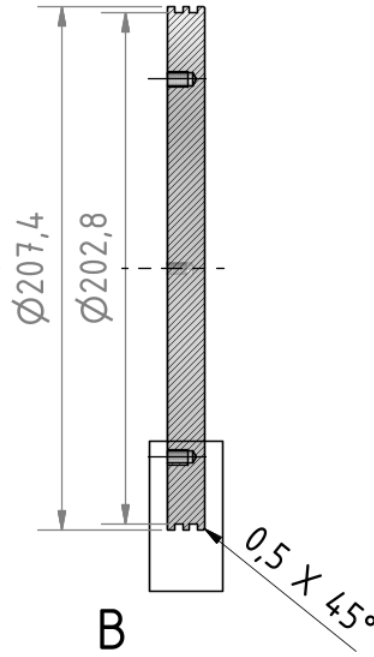

B ( 1:1 )

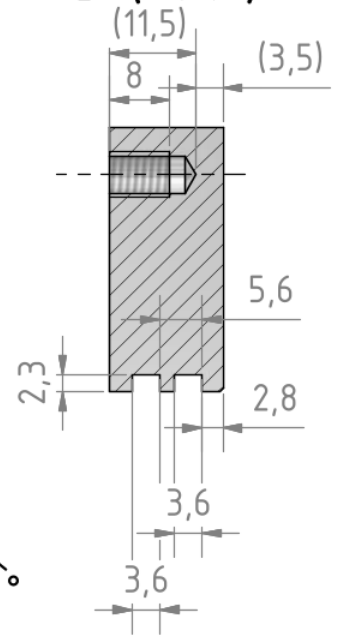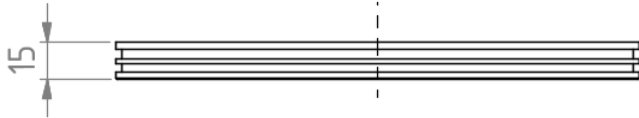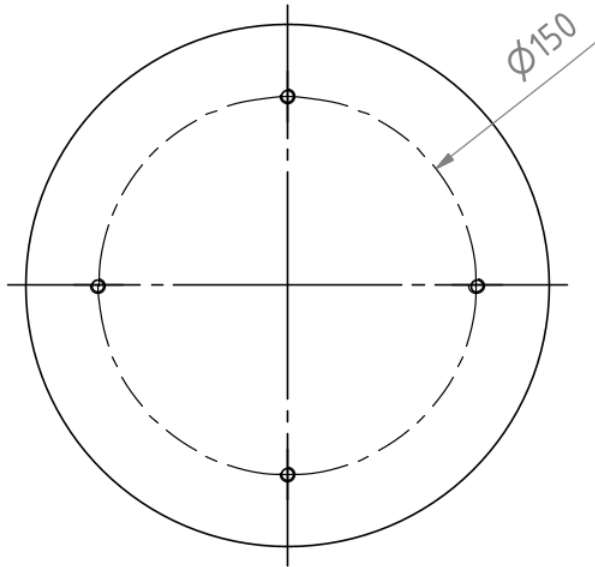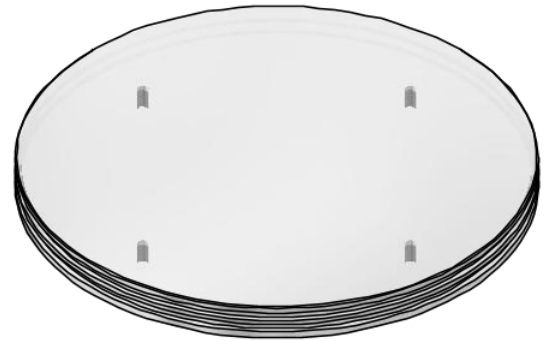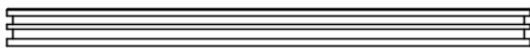

Rev\_B: Zentrierung (195mm) weggelassen

|                                                                                                                                                                                                       |                                                                                                                                 |                                                   |                                                   |               |
|-------------------------------------------------------------------------------------------------------------------------------------------------------------------------------------------------------|---------------------------------------------------------------------------------------------------------------------------------|---------------------------------------------------|---------------------------------------------------|---------------|
| <b>DEUTSCHES GEOLFORSCHUNGSZENTRUM POTSDAM</b><br><br>Helmholtz-Zentrum<br><b>POTSDAM</b><br><b>GEOMORPHOLOGIE</b> | ISO 2768-FH                                                                                                                     | Maßstab 1 : 3                                     | Gewicht 0,59 kg                                   |               |
|                                                                                                                                                                                                       | unbemaßte Werkstück-<br>kanten ISO 13715<br> | Werkstoff: PMMA<br>(CAD-Modell: Acrylglas (PMMA)) | Stückzahl<br>1                                    |               |
|                                                                                                                                                                                                       |                                                                                                                                 | Boden 1                                           |                                                   |               |
|                                                                                                                                                                                                       |                                                                                                                                 | Datei: Boden 1.ipt                                |                                                   |               |
| konstruiert<br>Ingenieur<br>Revision                                                                                                                                                                  | Datum<br>12.02.2019<br>B                                                                                                        | Name<br>Markus Reich<br>Markus Reich              | Auftrag: Jens Turowski<br>Projekt: Abrasionsmühle | Bl.1<br>Gr.A4 |

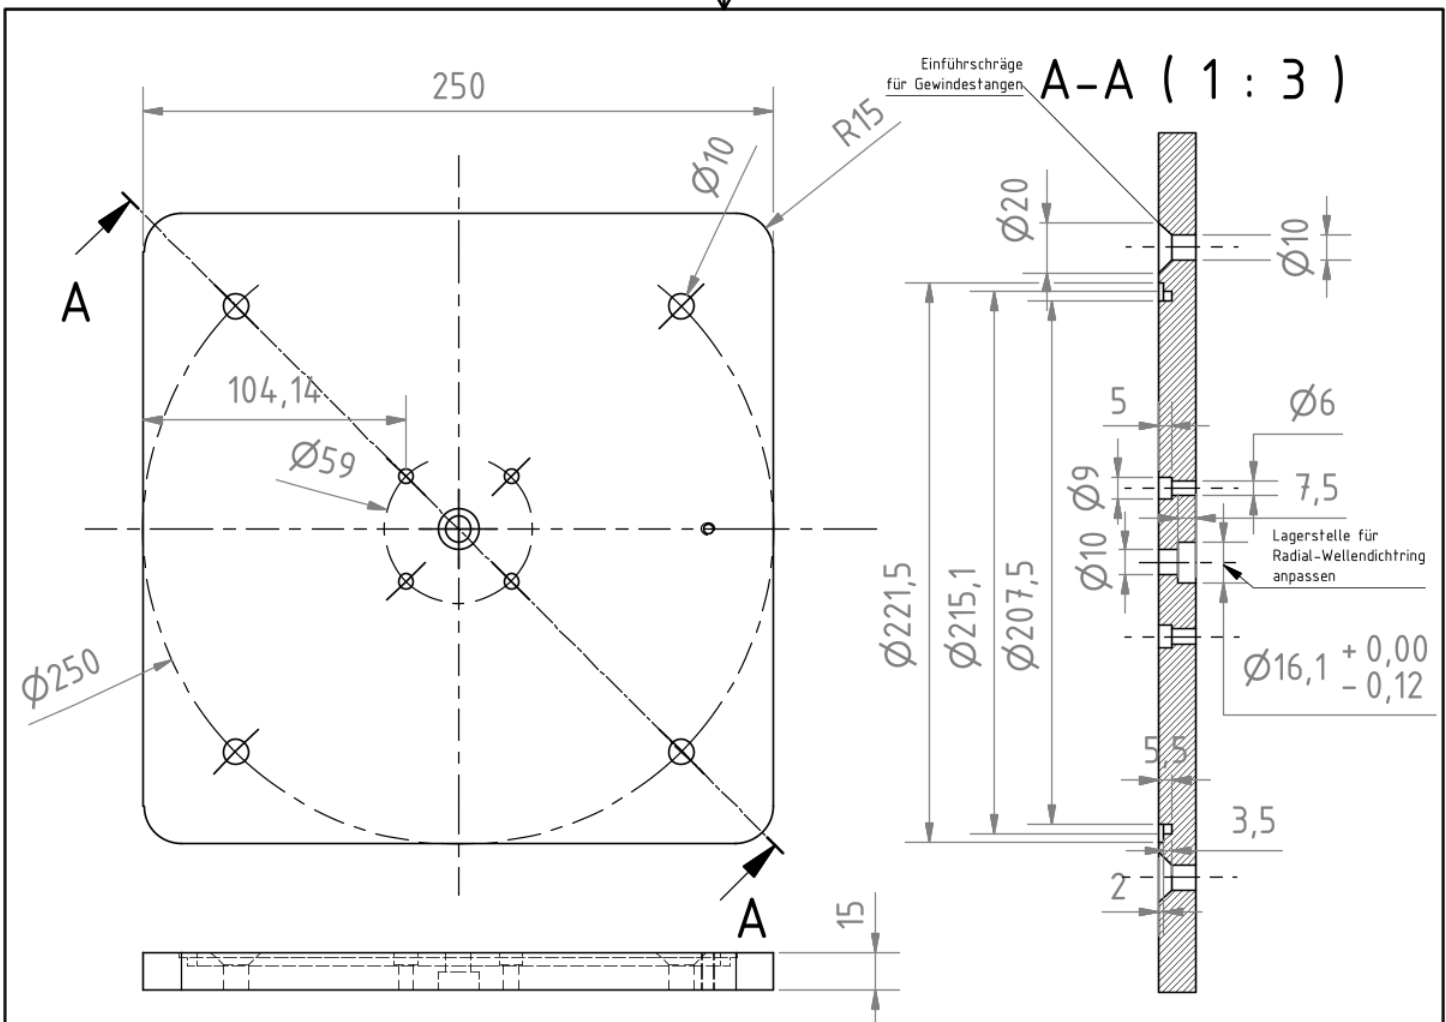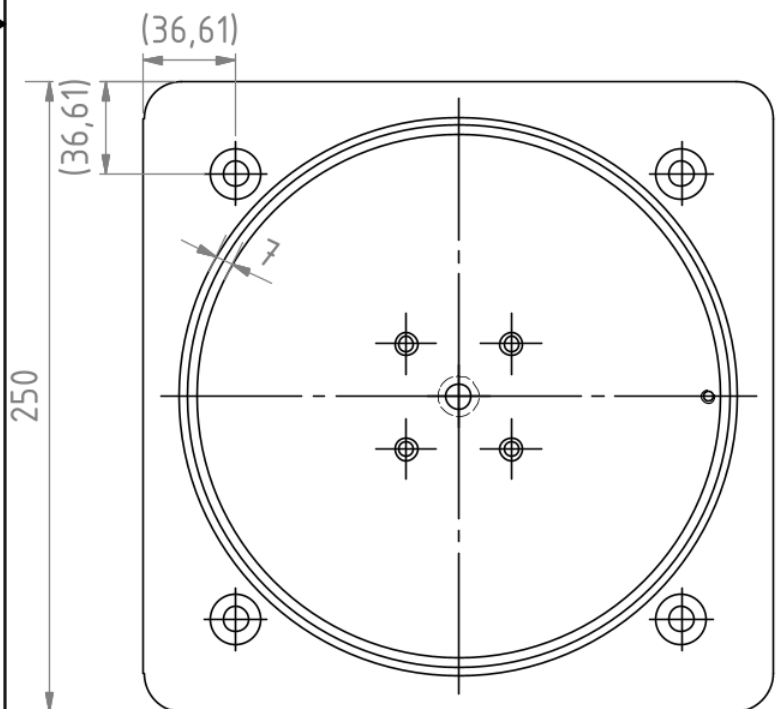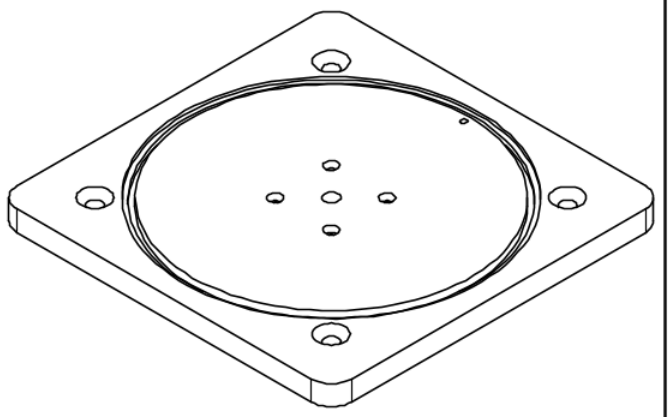

siehe sat-datei

| <b>DEUTSCHES GEOLFORSCHUNGSZENTRUM POTSDAM</b><br><br>Helmholtz-Zentrum<br><b>POTSDAM</b><br><b>5.1 GEOMORPHOLOGIE</b> | ISO 2768-FH                                                                                                                                                                                                                                                                                               | Maßstab 1 : 3                                          | Gewicht 1.09 kg |      |             |  |              |           |            |              |          |   |  |                                            |               |
|-----------------------------------------------------------------------------------------------------------------------------------------------------------------------------------------------------------|-----------------------------------------------------------------------------------------------------------------------------------------------------------------------------------------------------------------------------------------------------------------------------------------------------------|--------------------------------------------------------|-----------------|------|-------------|--|--------------|-----------|------------|--------------|----------|---|--|--------------------------------------------|---------------|
|                                                                                                                                                                                                           | unbemaßte Werkstück-<br>kanten ISO 13715<br>                                                                                                                                                                           | Werkstoff: Acrylglas<br>(CAD-Modell: Acrylglas (PMMA)) | Stückzahl<br>1  |      |             |  |              |           |            |              |          |   |  |                                            |               |
|                                                                                                                                                                                                           | <table border="1"> <thead> <tr> <th></th> <th>Datum</th> <th>Name</th> </tr> </thead> <tbody> <tr> <td>konstruiert</td> <td></td> <td>Markus Reich</td> </tr> <tr> <td>Ingenieur</td> <td>30.10.2018</td> <td>Markus Reich</td> </tr> <tr> <td>Revision</td> <td>B</td> <td></td> </tr> </tbody> </table> |                                                        | Datum           | Name | konstruiert |  | Markus Reich | Ingenieur | 30.10.2018 | Markus Reich | Revision | B |  | <b>Deckplatte</b><br>Datei: Deckplatte.ipt | Bl.1<br>Gr.A4 |
|                                                                                                                                                                                                           |                                                                                                                                                                                                                                                                                                           | Datum                                                  | Name            |      |             |  |              |           |            |              |          |   |  |                                            |               |
| konstruiert                                                                                                                                                                                               |                                                                                                                                                                                                                                                                                                           | Markus Reich                                           |                 |      |             |  |              |           |            |              |          |   |  |                                            |               |
| Ingenieur                                                                                                                                                                                                 | 30.10.2018                                                                                                                                                                                                                                                                                                | Markus Reich                                           |                 |      |             |  |              |           |            |              |          |   |  |                                            |               |
| Revision                                                                                                                                                                                                  | B                                                                                                                                                                                                                                                                                                         |                                                        |                 |      |             |  |              |           |            |              |          |   |  |                                            |               |
|                                                                                                                                                                                                           | Auftrag: Jens Turowski<br>Projekt: Erosionsmühle                                                                                                                                                                                                                                                          |                                                        |                 |      |             |  |              |           |            |              |          |   |  |                                            |               |

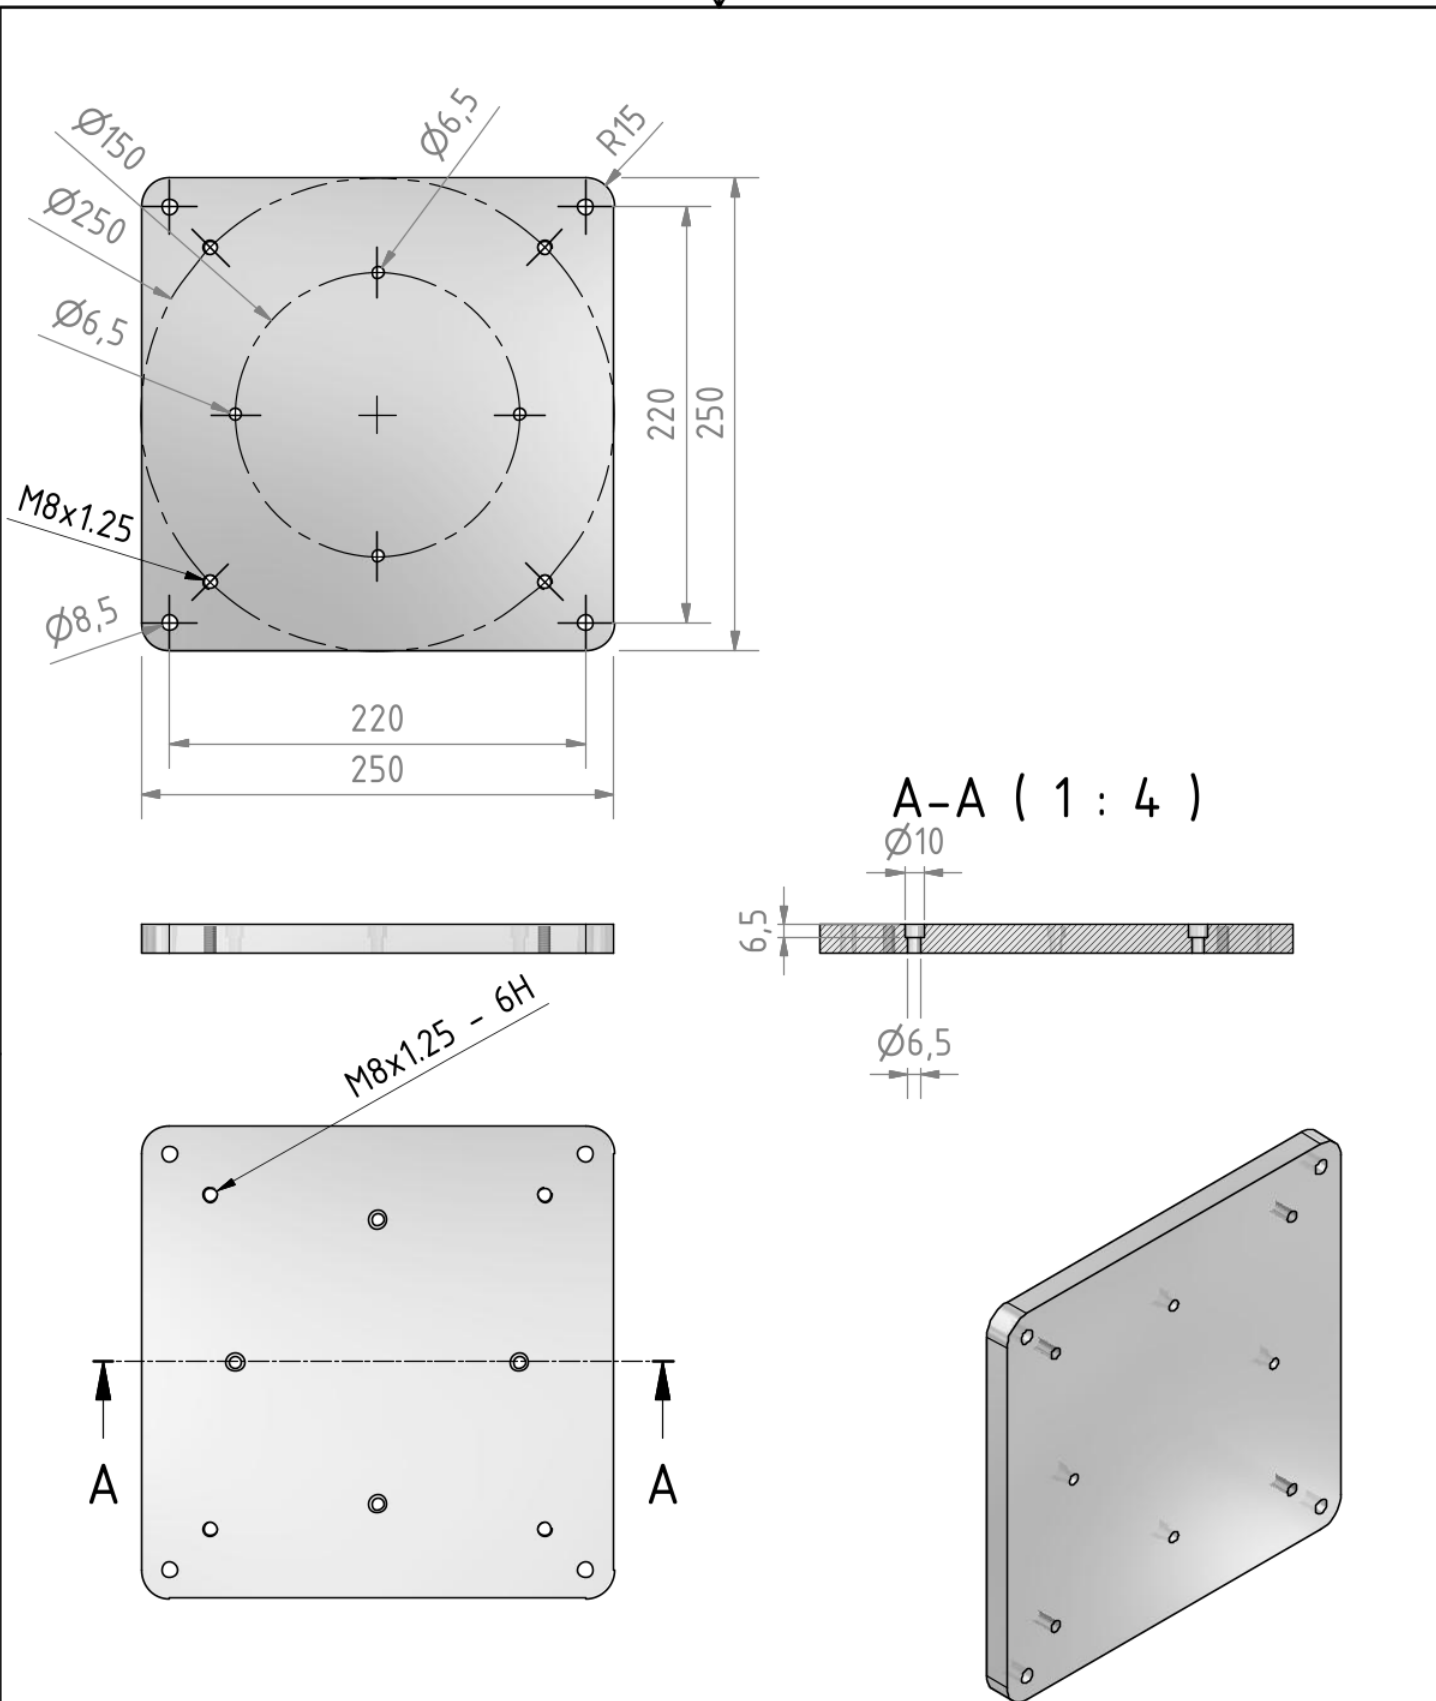

siehe sat-Datei

|                                                                                                                                                                                                      |                                                                                                                                 |                                                   |                                                   |               |
|------------------------------------------------------------------------------------------------------------------------------------------------------------------------------------------------------|---------------------------------------------------------------------------------------------------------------------------------|---------------------------------------------------|---------------------------------------------------|---------------|
| <b>DEUTSCHES GEOFORSCHUNGSZENTRUM POTSDAM</b><br><br>Helmholtz-Zentrum<br><b>POTSDAM</b><br><b>GEOMORPHOLOGIE</b> | ISO 2768-FH                                                                                                                     | Maßstab 1 : 4                                     | Gewicht 1,11 kg                                   |               |
|                                                                                                                                                                                                      | unbemaßte Werkstück-<br>kanten ISO 13715<br> | Werkstoff: PMMA<br>(CAD-Modell: Acrylglas (PMMA)) | Stückzahl<br>1                                    |               |
|                                                                                                                                                                                                      |                                                                                                                                 | Grundplatte 1                                     |                                                   |               |
|                                                                                                                                                                                                      |                                                                                                                                 | Datei: Grundplatte 1.ipt                          |                                                   |               |
| konstruiert<br>Ingenieur<br>Revision                                                                                                                                                                 | Datum<br>12.02.2019<br>B                                                                                                        | Name<br>Markus Reich<br>Markus Reich              | Auftrag: Jens Turowski<br>Projekt: Abrasionsmühle | Bl.1<br>Gr.A4 |

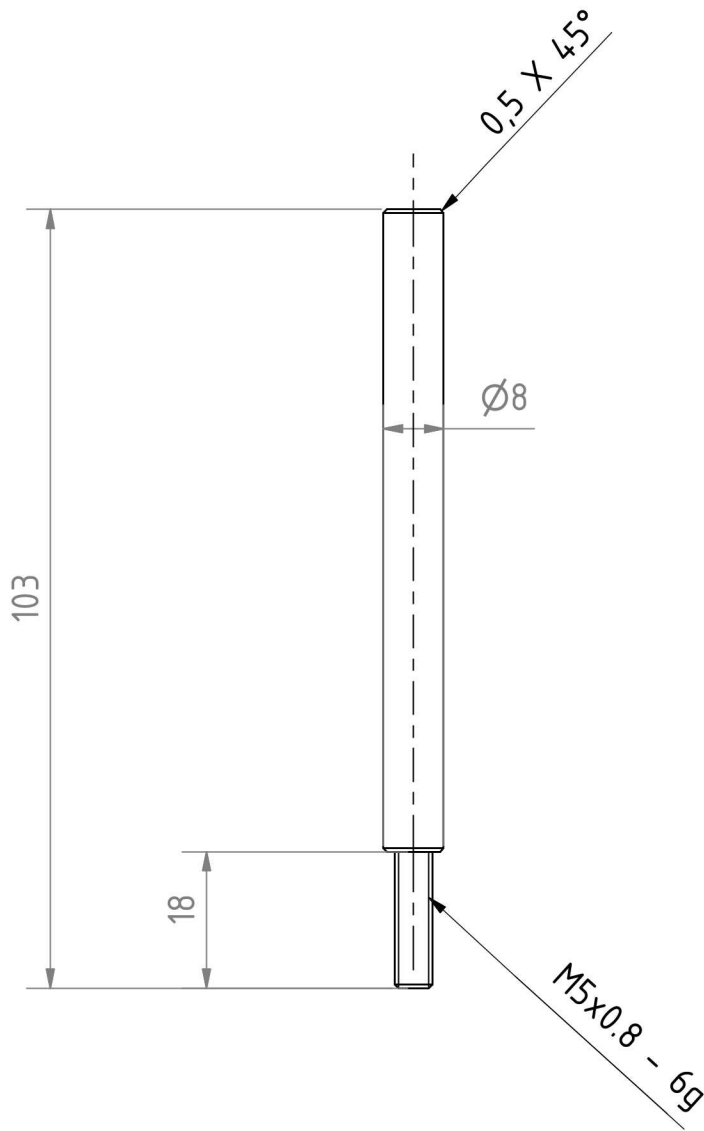

|                                                                                                                                                                                                |                                                                                                                                 |              |                                                          |                        |  |
|------------------------------------------------------------------------------------------------------------------------------------------------------------------------------------------------|---------------------------------------------------------------------------------------------------------------------------------|--------------|----------------------------------------------------------|------------------------|--|
| <b>DEUTSCHES GEOLFORSCHUNGSZENTRUM POTSDAM</b><br><br>Helmholtz-Zentrum<br><b>POTSDAM</b><br>GEOMORPHOLOGIE | ISO 2768-FH                                                                                                                     |              | Maßstab 1 : 1                                            | Gewicht 36,25 g        |  |
|                                                                                                                                                                                                | unbemaßte Werkstück-<br>kanten ISO 13715<br> |              | Werkstoff: Silberstahl<br>(CAD-Modell: Stahl, Legierung) | Stückzahl<br>9         |  |
|                                                                                                                                                                                                |                                                                                                                                 |              | Propellerwelle                                           |                        |  |
|                                                                                                                                                                                                |                                                                                                                                 |              | Datei: Propellerwelle.ipt                                |                        |  |
|                                                                                                                                                                                                | Datum                                                                                                                           | Name         |                                                          |                        |  |
| konstruiert                                                                                                                                                                                    | 30.10.2018                                                                                                                      | Markus Reich |                                                          | Auftrag: Jens Turowski |  |
| Ingenieur                                                                                                                                                                                      |                                                                                                                                 | Markus Reich |                                                          | Projekt: Erosionsmühle |  |
| Revision                                                                                                                                                                                       | B                                                                                                                               |              |                                                          | Bl.1<br>Gr.A4          |  |
